# Supplementary material for: A novel method of nicotine quantification in electronic cigarette liquids and aerosols
Source: Royal Society of Chemistry journal article supplement (doi:10.1039/c7ay00501f), 2017-01-01
Supplement: c7ay00501f1.pdf [file c7ay00501f1.pdf]

## Supplementary Information

### Novel method of nicotine quantification in electronic cigarette liquids and aerosols

Mumiye A. Ogunwale, M.S.<sup>1,4</sup>; Yizheng Chen, Ph.D.<sup>2</sup>; Whitney S. Theis, M.S.<sup>3,4</sup>;  
Michael H. Nantz, Ph.D.<sup>1,4</sup>; Daniel J. Conklin, Ph.D.<sup>3,4</sup>; Xiao-An Fu, Ph.D.<sup>2,4\*</sup>

<sup>1</sup>Department of Chemistry, <sup>2</sup>Department of Chemical Engineering, <sup>3</sup>Diabetes and Obesity Center, and  
<sup>4</sup>American Heart Association – Tobacco Regulation and Addiction Center, University of Louisville,  
Louisville, KY 40208

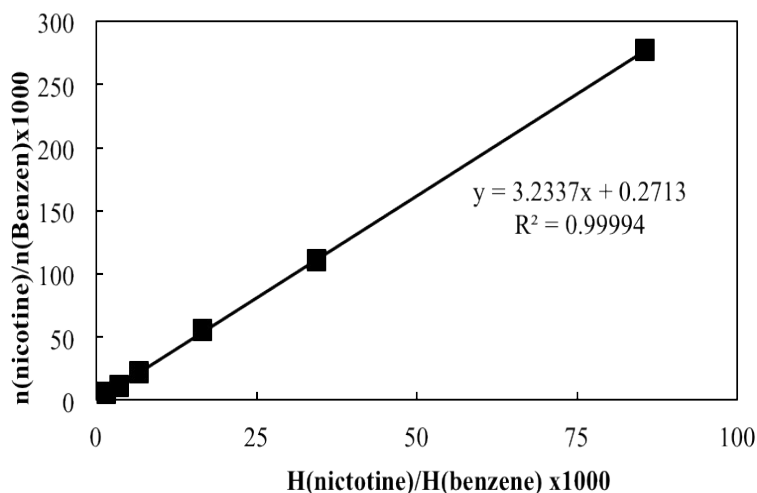

Figure S1 Plot of  $n(\text{nicotine})/n(\text{benzene})$  vs.  $H(\text{nicotine})/H(\text{benzene})$ , serving as a calibration curve for  $^1\text{H}$  NMR measurement of nicotine protonation.

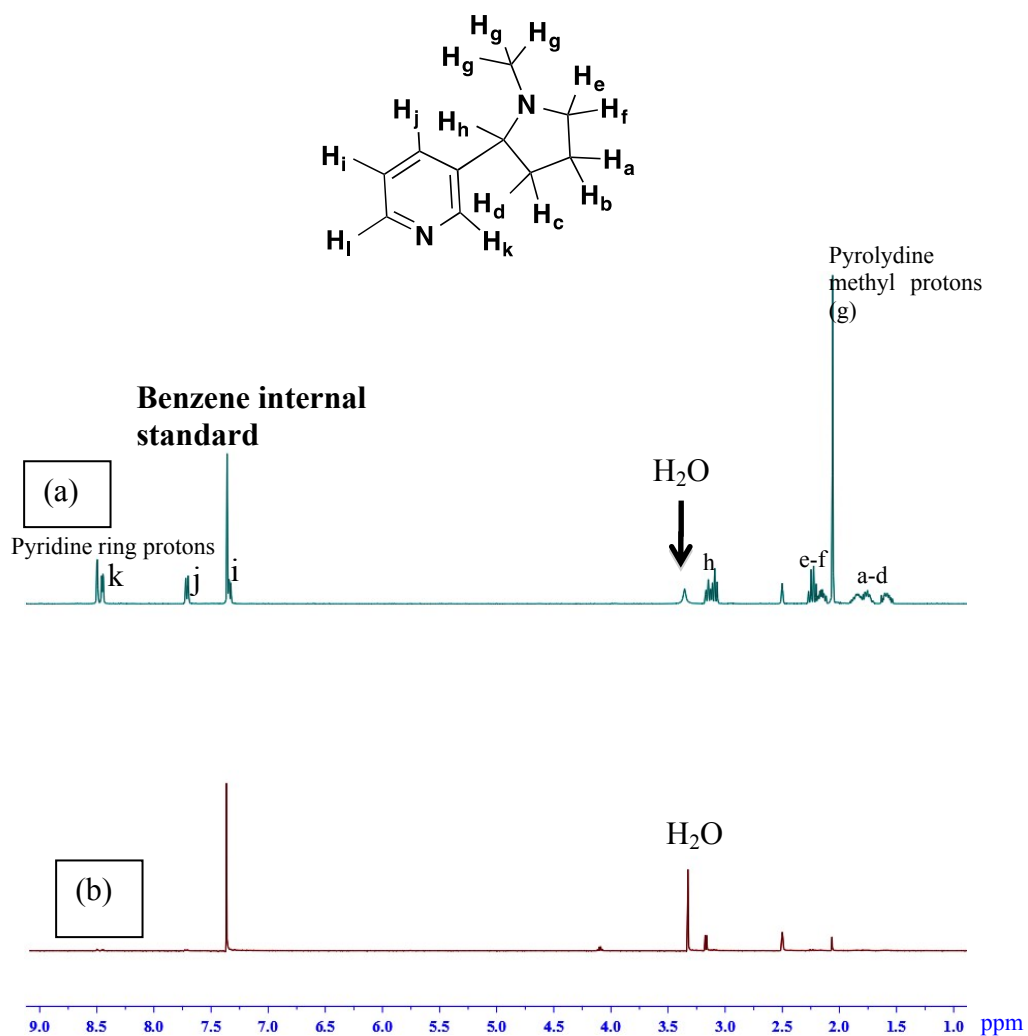

**Figure S2.** (a)  $^1\text{H}$  NMR spectra (DMSO- $d_6$ ) of neutral nicotine and (b)  $^1\text{H}$  NMR spectra (DMSO- $d_6$ ) of extracted nicotine after 30 minutes of protonation in water and HCl mixture (Less than 2% of free base left unprotonated). Quantification achieved by introduction of benzene as internal standard.

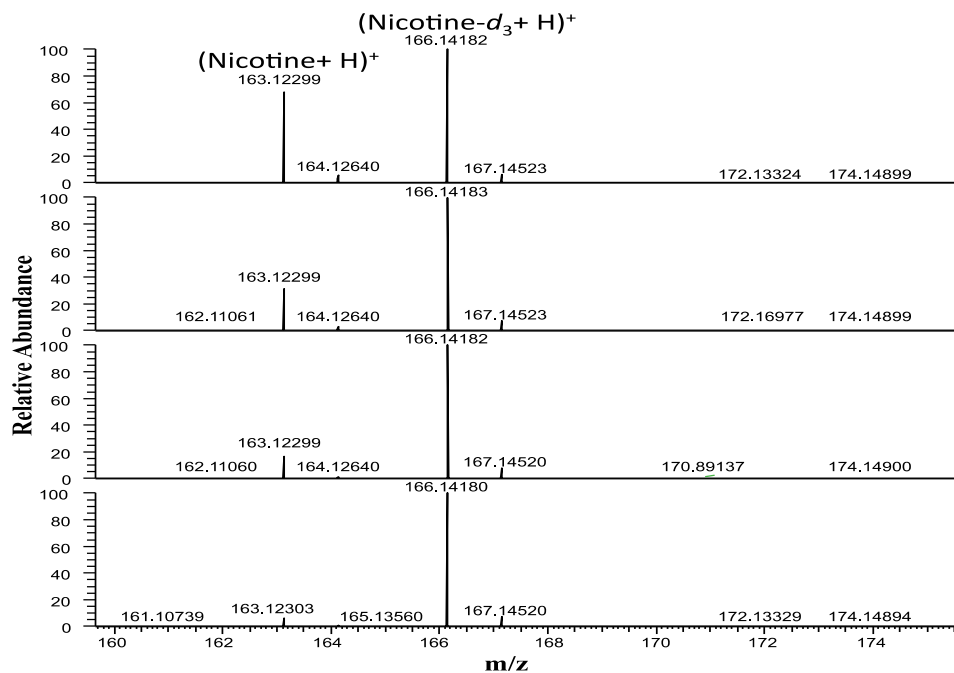

**Figure S3.** Comparison of FT-ICR-MS spectra of standard calibration curve working solutions, each spiked with 7.78 nmol nicotine- $d_3$  as an internal standard. The nicotine peak grows relative to the internal standard peak as the nicotine concentration increases.
